# Supplementary material for: In situ generated CF3CHN2 with 3-ylideneoxindoles to access CF3-containing pyrazolo[1,5-c]quinazolines derivatives
Source: Royal Society of Chemistry journal article supplement (doi:10.1039/d4ra06651k), 2024-01-01
Supplement: d4ra06651k1.pdf [file d4ra06651k1.pdf]

## ***In Situ* Generated CF<sub>3</sub>CHN<sub>2</sub> with 3-Ylideneoxindoles to Access CF<sub>3</sub>-Containing Pyrazolo[1,5-c]quinazolines Derivatives**

Ming-Cheng Hu,<sup>a</sup> Hai-Tao Zhou,<sup>a</sup> Yu-Chen Fang,<sup>a</sup> Li-Ren Zhang,<sup>a</sup> Bao-Dong Cui,<sup>a,b</sup>

Yong-Zheng Chen<sup>\*a,b</sup> and Mei Bai<sup>\*a,b</sup>

<sup>a</sup>Key Laboratory of Biocatalysis & Chiral Drug Synthesis of Guizhou Province, School of Pharmacy, Zunyi Medical University, Zunyi 563006, P. R. China

<sup>b</sup>Key Laboratory of Basic Pharmacology of Ministry of Education and Joint International Research Laboratory of Ethnomedicine of Ministry of Education, Zunyi Medical University, Zunyi 563006, P. R. China

E-mail: cuibd@zmu.edu.cn; cuibaodong85@163.com

---

---

## Supporting Information

### Table of Contents

|                                                                                              |            |
|----------------------------------------------------------------------------------------------|------------|
| <b>1. General experimental information .....</b>                                             | <b>S1</b>  |
| <b>2. Optimization of the reaction conditions for the construction of 4a .....</b>           | <b>S2</b>  |
| <b>3. Synthetic methods of substrates.....</b>                                               | <b>S3</b>  |
| 3.1 Synthesis of 3-ylideneoxindoles <b>3a–w</b> .....                                        | <b>S3</b>  |
| <b>4. Representative procedure for the synthesis of compound 4a .....</b>                    | <b>S3</b>  |
| <b>5. Characterization data of compounds 4a–w .....</b>                                      | <b>S4</b>  |
| <b>6. Transformation of 4k into 5–10.....</b>                                                | <b>S13</b> |
| 6.1 Synthesis of <b>5</b> from <b>4k</b> .....                                               | <b>S13</b> |
| 6.2 Synthesis of <b>6</b> from <b>4k</b> .....                                               | <b>S13</b> |
| 6.3 Synthesis of <b>7</b> from <b>4k</b> .....                                               | <b>S14</b> |
| 6.4 Synthesis of <b>8</b> from <b>4k</b> .....                                               | <b>S14</b> |
| 6.5 Synthesis of <b>9</b> from <b>4k</b> .....                                               | <b>S15</b> |
| 6.6 Synthesis of <b>10</b> from <b>4k</b> .....                                              | <b>S15</b> |
| <b>7. Reference .....</b>                                                                    | <b>S17</b> |
| <b>8. X-ray crystallographic data of 4a .....</b>                                            | <b>S18</b> |
| <b>8. <sup>1</sup>H, <sup>13</sup>C and <sup>19</sup>F NMR spectra of 4a–w and 5–10.....</b> | <b>S19</b> |

## 1. General experimental information

Unless otherwise specified, all commercially available reagents are utilized without the need for further purification. Silica gel column chromatography (300–400 mesh) is employed.  $^1\text{H}$ ,  $^{19}\text{F}$ , and  $^{13}\text{C}$  NMR spectra were measured on 400, 376, and 100 MHz spectrometers, respectively.  $\text{CDCl}_3$  was used as a solvent, chemical shifts were reported in ppm ( $\delta$ ) from tetramethylsilane (TMS) with the solvent resonance as the internal standard. Data were reported as follows: chemical shift, multiplicity (s = singlet, d = doublet, t = triplet, dd = doublet of doublets, td = triplet of doublets, ddd = doublet of doublets, dt = doublet of triplets, dq = doublet of quartets, m = multiplet), coupling constants (Hz) and integration. High-resolution mass spectra HRMS measurements were obtained on a TOF analyzer.

Preparation of 3-ylideneoxindoles (**3a–w**) was conducted following the previously reported and all reagents used for the reaction were purchased from Biddepharm (China), Tansoole (China), or Innochem (China).

## 2. Optimization of the reaction conditions for the construction of 4a<sup>a</sup>



| Entry           | Solvent           | Temperature (°C) | Base (x equiv.)                       | Yield (%) <sup>b</sup> |
|-----------------|-------------------|------------------|---------------------------------------|------------------------|
| 1 <sup>c</sup>  | Et <sub>2</sub> O | rt               | DBU (0.5)                             | 40                     |
| 2 <sup>c</sup>  | 1,4-dioxane       | rt               | DBU (0.5)                             | N.R.                   |
| 3 <sup>c</sup>  | THF               | rt               | DBU (0.5)                             | N.R.                   |
| 4 <sup>c</sup>  | DCM               | rt               | DBU (0.5)                             | 33                     |
| <b>5</b>        | <b>PhMe</b>       | rt               | <b>DBU (0.5)</b>                      | <b>78</b>              |
| 6 <sup>d</sup>  | PhMe              | rt               | DBU (0.5)                             | 39                     |
| 7 <sup>e</sup>  | PhMe              | rt               | DBU (0.5)                             | 55                     |
| 8 <sup>f</sup>  | PhMe              | rt               | DBU (0.5)                             | 68                     |
| 9               | PhMe              | rt               | Cs <sub>2</sub> CO <sub>3</sub> (0.5) | N.R.                   |
| 10              | PhMe              | rt               | K <sub>2</sub> CO <sub>3</sub> (0.5)  | N.R.                   |
| 11              | PhMe              | rt               | Et <sub>3</sub> N (0.5)               | N.R.                   |
| 12              | PhMe              | rt               | NaOH (0.5)                            | N.R.                   |
| 13              | PhMe              | rt               | <sup>t</sup> BuOK (0.5)               | N.R.                   |
| 14              | PhMe              | rt               | DBN (0.5)                             | 50                     |
| 15              | PhMe              | rt               | DBU (0.25)                            | 60                     |
| 16              | PhMe              | rt               | DBU (0.75)                            | 60                     |
| 17              | PhMe              | rt               | DBU (1.0)                             | 50                     |
| 18              | PhMe              | -10              | DBU (0.5)                             | 66                     |
| 19              | PhMe              | 0                | DBU (0.5)                             | 59                     |
| 20              | PhMe              | 40               | DBU (0.5)                             | 46                     |
| 21 <sup>g</sup> | PhMe              | rt               | DBU (0.5)                             | 35                     |
| 22 <sup>h</sup> | PhMe              | rt               | DBU (0.5)                             | 42                     |
| 23 <sup>i</sup> | PhMe              | rt               | DBU (0.5)                             | 65                     |

<sup>a</sup>Standard conditions: performed with CF<sub>3</sub>CH<sub>2</sub>NH<sub>2</sub>·HCl (1.5 mmol, 6.0 equiv.), NaNO<sub>2</sub> (1.65 mmol, 6.6 equiv.) 0.2 mL H<sub>2</sub>O at 0 °C for 2 h. The mixture is then dried with Sodium sulfate anhydrous, then **3a** (0.25 mmol, 1.0 equiv.), DBU (0.5 equiv.) and 5 mL of drying solvent were added at room temperature under O<sub>2</sub> atmosphere (balloon) for 48 h. <sup>b</sup>Isolated yields based on **3a** are given. <sup>c</sup>The reaction was performed for 120 h. <sup>d</sup>The reaction was performed in 3 mL of dry solvent. <sup>e</sup>The reaction was performed in 10 mL of dry solvent. <sup>f</sup>The reaction was performed in 15 mL of dry solvent. <sup>g</sup>2.0 equiv. of CF<sub>3</sub>CH<sub>2</sub>NH<sub>2</sub>·HCl was used. <sup>h</sup>4.0 equiv. of CF<sub>3</sub>CH<sub>2</sub>NH<sub>2</sub>·HCl was used. <sup>i</sup>10.0 equiv. of CF<sub>3</sub>CH<sub>2</sub>NH<sub>2</sub>·HCl was used.

### 3. Synthetic methods of substrates

#### 3.1 Synthesis of 3-ylideneoxindoles **3a-w**



Select a 150 mL double-mouth bottle, add the stirring agent, isatin (15 mmol, 1.0 equiv.), K<sub>2</sub>CO<sub>3</sub> (30 mmol, 2.0 equiv.) and dissolve in 10 mL DMF. The reaction was vigorously stirred in an oil bath at 100 °C for 5 min and CH<sub>3</sub>I (30 mmol, 2.0 equiv.) was added for reflux reaction for 5 h. After the reaction was complete, ice water was added to the reaction mixture, standing for 30 min, and the crude product 1-methylindole-2, 3-dione was filtered.

A clean nightshade bottle with a capacity of 100 mL was chosen next for further steps in the process. Into this reaction vessel, 1-methylindole-2, 3-dione is weighed (6.0 mmol, 1.0 equiv.), ethyl bromoacetate (6.6 mmol, 1.1 equiv.), triphenylphosphine (6.6 mmol, 1.1 equiv.), and morpholine (6.0 mmol, 1.0 equiv.) were precisely measured out and added sequentially at a temperature maintained at around 80 °C for about 10 min duration. The progress of this subsequent reaction step also underwent monitoring via the TLC method. Following completion, the target compound series labeled as "**3a-w**" was purified through column chromatography (using a solvent system of petroleum ether/ethyl acetate = 10:1).<sup>1</sup>

#### 4. Representative procedure for the synthesis of compound **4a**



CF<sub>3</sub>CH<sub>2</sub>NH<sub>2</sub>·HCl (1.5 mmol, 6.0 equiv.), NaNO<sub>2</sub> (1.65 mmol, 6.6 equiv.), 0.2 mL H<sub>2</sub>O at 0 °C for 2 h.<sup>2</sup> The mixture was then dried with anhydrous sodium sulfate and then added with **3a** (0.25 mmol, 1.0 equiv.), DBU (0.5 equiv.) and stirred at room temperature in 5 mL of drying solvent under O<sub>2</sub> atmosphere (balloon) for 48 h. Finally, the mixture was concentrated under reduced pressure and then purified by silica gel flash column chromatography (using a solvent system of petroleum ether/ethyl acetate = 10:1) to obtain the target compound **4a** (65.9 mg, yield 78%).

## 5. Characterization data of compounds 4a-w



Scheme 2, 4a

### Ethyl 6-methyl-5-oxo-2-(trifluoromethyl)-5,6-dihydropyrazolo[1,5-c]quinazoline-1-carboxylate

**(4a):** White solid, 65.9 mg, 78% yield, m.p. 161.5 – 162.6 °C;  $^1\text{H NMR}$ : (400 MHz,  $\text{CDCl}_3$ )  $\delta$  9.06 (dd,  $J = 8.4, 1.6$  Hz, 1H), 7.72 – 7.68 (m, 1H), 7.44 – 7.40 (m, 2H), 4.46 (q,  $J = 7.2$  Hz, 2H), 3.86 (s, 3H), 1.44 (t,  $J = 7.2$  Hz, 3H);  $^{13}\text{C NMR}$ : (100 MHz,  $\text{CDCl}_3$ )  $\delta$  162.09, 146.23 (q,  $J = 38.1$  Hz), 144.54, 141.81, 136.56, 132.79, 127.72, 124.33, 120.30 (q,  $J = 269.5$  Hz), 114.87, 112.28, 108.88, 62.27, 31.93, 13.83;  $^{19}\text{F NMR}$ : (376 MHz,  $\text{CDCl}_3$ )  $\delta$  - 61.66 (s, 3F,  $\text{CF}_3$ ); **HRMS-ESI (m/z):** calcd for  $\text{C}_{15}\text{H}_{12}\text{F}_3\text{N}_3\text{O}_3$   $[\text{M}+\text{H}]^+$  340.0909, found 340.0904.



Scheme 2, 4b

### Ethyl 10-chloro-6-methyl-5-oxo-2-(trifluoromethyl)-5,6-dihydropyrazolo[1,5-c]quinazoline-1-carboxylate

**(4b):** White solid, 42.1 mg, 45% yield, m.p. 124.1 – 125.5 °C;  $^1\text{H NMR}$ : (400 MHz,  $\text{CDCl}_3$ )  $\delta$  7.58 (t,  $J = 8.4$  Hz, 1H), 7.42 (d,  $J = 8.0$  Hz, 1H), 7.34 (d,  $J = 8.8$  Hz, 1H), 4.38 (q,  $J = 7.2$  Hz, 2H), 3.81 (s, 3H), 1.34 (t,  $J = 7.2$  Hz, 3H);  $^{13}\text{C NMR}$ : (100 MHz,  $\text{CDCl}_3$ )  $\delta$  162.53, 145.08 (q,  $J = 38.7$  Hz), 144.12, 138.49, 137.26, 132.28, 132.16, 126.57, 120.16 (q,  $J = 269.8$  Hz), 113.77, 112.74, 111.55, 62.44, 32.56, 13.90;  $^{19}\text{F NMR}$ : (376 MHz,  $\text{CDCl}_3$ )  $\delta$  - 62.03 (s, 3F,  $\text{CF}_3$ ); **HRMS-ESI (m/z):** calcd for  $\text{C}_{15}\text{H}_{11}\text{ClF}_3\text{N}_3\text{O}_3$   $[\text{M}+\text{Na}]^+$  396.0339, found 396.0342.



Scheme 2, 4c

### Ethyl 10-bromo-6-methyl-5-oxo-2-(trifluoromethyl)-5,6-dihydropyrazolo[1,5-c]quinazoline-1-carboxylate

**(4c):** Yellow solid, 40.1 mg, 38% yield, m.p. 156.3 – 157.8 °C;  $^1\text{H NMR}$ : (400 MHz,  $\text{CDCl}_3$ )  $\delta$  7.63 (d,  $J = 8.0$  Hz, 1H), 7.50 (t,  $J = 8.4$  Hz, 1H), 7.38 (d,  $J = 8.4$  Hz, 1H), 4.39 (q,  $J = 6.8$  Hz, 2H), 3.80

(s, 2H), 1.33 (t,  $J = 7.2$  Hz, 3H);  $^{13}\text{C NMR}$ : (100 MHz,  $\text{CDCl}_3$ )  $\delta$  162.28, 145.24 (q,  $J = 38.6$  Hz), 144.13, 139.33, 138.85, 132.39, 130.26, 121.18, 120.15 (q,  $J = 269.8$  Hz), 114.25, 113.17, 112.50, 62.44, 32.52, 13.86;  $^{19}\text{F NMR}$ : (376 MHz,  $\text{CDCl}_3$ )  $\delta$  - 62.07 (s, 3F,  $\text{CF}_3$ ); **HRMS-ESI (m/z)**: calcd for  $\text{C}_{15}\text{H}_{11}\text{BrF}_3\text{N}_3\text{O}_3$   $[\text{M}+\text{Na}]^+$  439.9834, found 439.9832.



Scheme 2, 4d

**Ethyl 9-fluoro-6-methyl-5-oxo-2-(trifluoromethyl)-5,6-dihydropyrazolo[1,5-c]quinazoline-1-carboxylate (4d)**: Purple solid, 54.6 mg, 61% yield, m.p. 201.7 – 202.8 °C;  $^1\text{H NMR}$ : (400 MHz,  $\text{CDCl}_3$ )  $\delta$  8.93 (dd,  $J = 9.6, 2.4$  Hz, 1H), 7.43 – 7.36 (m, 2H), 4.46 (q,  $J = 7.2$  Hz, 2H), 3.84 (s, 3H), 1.43 (t,  $J = 6.8$  Hz, 3H);  $^{13}\text{C NMR}$ : (100 MHz,  $\text{CDCl}_3$ )  $\delta$  161.78, 158.67 (d,  $J = 243.4$  Hz), 146.42 (q,  $J = 38.3$  Hz), 144.20, 141.12, 133.19, 120.39 (d,  $J = 23.4$  Hz), 120.21 (q,  $J = 269.6$  Hz), 116.62 (d,  $J = 8.5$  Hz), 114.22 (d,  $J = 26.9$  Hz), 113.43 (d,  $J = 10.0$  Hz), 109.49, 62.45, 32.30, 13.81;  $^{19}\text{F NMR}$ : (376 MHz,  $\text{CDCl}_3$ )  $\delta$  - 61.69 (s, 3F,  $\text{CF}_3$ ),  $\delta$  - 115.77 (s, 1F); **HRMS-ESI (m/z)**: calcd for  $\text{C}_{15}\text{H}_{12}\text{F}_3\text{N}_3\text{O}_3$   $[\text{M}+\text{H}]^+$  358.0815, found 358.0808.



Scheme 2, 4e

**Ethyl 9-chloro-6-methyl-5-oxo-2-(trifluoromethyl)-5,6-dihydropyrazolo[1,5-c]quinazoline-1-carboxylate (4e)**: White solid, 51.3 mg, 55% yield, m.p. 206.8 – 207.1 °C;  $^1\text{H NMR}$ : (400 MHz,  $\text{CDCl}_3$ )  $\delta$  9.19 (d,  $J = 2.4$  Hz, 1H), 7.67 – 7.64 (m, 1H), 7.35 (d,  $J = 8.8$  Hz, 1H), 4.49 (q,  $J = 7.2$  Hz, 2H), 3.85 (s, 3H), 1.45 (t,  $J = 7.2$  Hz, 3H);  $^{13}\text{C NMR}$ : (100 MHz,  $\text{CDCl}_3$ )  $\delta$  161.78, 146.60 (d,  $J = 38.0$  Hz), 144.25, 140.83, 135.26, 132.79, 130.19, 127.53, 120.22 (q,  $J = 270.0$  Hz), 116.32, 113.55, 109.59, 63.98, 34.06, 15.14;  $^{19}\text{F NMR}$ : (376 MHz,  $\text{CDCl}_3$ )  $\delta$  - 61.71 (s, 3F,  $\text{CF}_3$ ); **HRMS-ESI (m/z)**: calcd for  $\text{C}_{15}\text{H}_{11}\text{ClF}_3\text{N}_3\text{O}_3$   $[\text{M}+\text{H}]^+$  374.0519, found 374.0512.



Scheme 2, 4f

**Ethyl 6,9-dimethyl-5-oxo-2-(trifluoromethyl)-5,6-dihydropyrazolo[1,5-c]quinazoline-1-carboxylate (4f):** White solid, 65.8 mg, 75% yield, m.p. 167.7 – 168.8 °C;  $^1\text{H NMR}$ : (400 MHz,  $\text{CDCl}_3$ )  $\delta$  8.80 (d,  $J = 0.8$  Hz, 1H), 7.49 (dd,  $J = 8.8, 2.0$  Hz, 1H), 7.28 (s, 1H), 4.49 (q,  $J = 7.2$  Hz, 2H), 3.83 (s, 3H), 2.49 (s, 3H), 1.46 (t,  $J = 7.2$  Hz, 3H);  $^{13}\text{C NMR}$ : (100 MHz,  $\text{CDCl}_3$ )  $\delta$  162.15, 146.18 (q,  $J = 37.7$  Hz), 144.54, 141.75, 134.48, 134.30, 133.79, 127.49, 120.37 (q,  $J = 269.5$  Hz), 114.73, 112.16, 108.69, 62.24, 31.88, 21.06, 13.87;  $^{19}\text{F NMR}$ : (376 MHz,  $\text{CDCl}_3$ )  $\delta$  - 61.63 (s, 3F,  $\text{CF}_3$ ); **HRMS-ESI (m/z):** calcd for  $\text{C}_{16}\text{H}_{15}\text{F}_3\text{N}_3\text{O}_3$   $[\text{M}+\text{H}]^+$  354.1066, found 354.1060.



Scheme 2, 4g

**Ethyl 9-methoxy-6-methyl-5-oxo-2-(trifluoromethyl)-5,6-dihydropyrazolo[1,5-c]quinazoline-1-carboxylate (4g):** White solid, 57.1 mg, 62% yield, m.p. 172.5 – 173.1 °C;  $^1\text{H NMR}$ : (400 MHz,  $\text{CDCl}_3$ )  $\delta$  8.71 (d,  $J = 2.8$  Hz, 1H), 7.28 – 7.21 (m, 2H), 4.44 (q,  $J = 7.2$  Hz, 2H), 3.89 (s, 3H), 3.80 (s, 3H), 1.42 (t,  $J = 7.2$  Hz, 3H);  $^{13}\text{C NMR}$ : (100 MHz,  $\text{CDCl}_3$ )  $\delta$  162.15, 156.02, 146.27 (q,  $J = 37.8$  Hz), 144.33, 141.88, 130.59, 121.04, 120.35 (q,  $J = 270.0$  Hz), 116.06, 113.04, 110.17, 108.79, 62.25, 55.95, 32.01, 13.84;  $^{19}\text{F NMR}$ : (376 MHz,  $\text{CDCl}_3$ )  $\delta$  - 61.58 (s, 3F,  $\text{CF}_3$ ); **HRMS-ESI (m/z):** calcd for  $\text{C}_{16}\text{H}_{14}\text{F}_3\text{N}_3\text{O}_4$   $[\text{M}+\text{H}]^+$  370.1015, found 370.1007.



Scheme 2, 4h

**Ethyl 6-methyl-5-oxo-9-(trifluoromethoxy)-2-(trifluoromethyl)-5,6-dihydropyrazolo[1,5-c]quinazoline-1-carboxylate (4h):** White solid, 69.6 mg, 66% yield, m.p. 191.3 – 191.6 °C;  $^1\text{H NMR}$ : (400 MHz,  $\text{CDCl}_3$ )  $\delta$  9.21 (d,  $J = 1.6$  Hz, 1H), 7.57 (dd,  $J = 9.2, 2.4$  Hz, 1H), 7.45 (d,  $J = 8.8$  Hz, 1H), 4.48 (q,  $J = 7.2$  Hz, 2H), 3.87 (s, 3H), 1.44 (t,  $J = 7.2$  Hz, 3H);  $^{13}\text{C NMR}$ : (100 MHz,  $\text{CDCl}_3$ )  $\delta$  161.73,

146.64 (d,  $J = 38.3$  Hz), 145.12, 144.21, 141.02, 135.16, 125.57, 120.55 (q,  $J = 257.2$  Hz), 120.51, 120.16 (q,  $J = 270.0$  Hz), 116.44, 113.40, 109.77, 62.55, 32.33, 13.80;  $^{19}\text{F}$  NMR: (376 MHz,  $\text{CDCl}_3$ )  $\delta$  - 58.20 (s, 3F,  $\text{CF}_3$ ),  $\delta$  - 61.74 (s, 3F,  $\text{CF}_3$ ); **HRMS-ESI (m/z)**: calcd for  $\text{C}_{16}\text{H}_{11}\text{F}_6\text{N}_3\text{O}_4$   $[\text{M}+\text{H}]^+$  424.0732, found 424.0727.



Scheme 2, 4i

**Ethyl 8-fluoro-6-methyl-5-oxo-2-(trifluoromethyl)-5,6-dihydropyrazolo[1,5-c]quinazoline-1-carboxylate (4i)**: Purple solid, 76.4 mg, 86% yield, m.p. 175.4 – 176.1 °C;  $^1\text{H}$  NMR: (400 MHz,  $\text{CDCl}_3$ )  $\delta$  9.20 (dd,  $J = 8.8, 6.0$  Hz, 1H), 7.14 – 7.07 (m, 2H), 4.44 (q,  $J = 7.2$  Hz, 2H), 3.81 (s, 3H), 1.42 (t,  $J = 7.2$  Hz, 3H);  $^{13}\text{C}$  NMR: (100 MHz,  $\text{cdcl}_3$ )  $\delta$  164.80 (d,  $J = 253.4$  Hz), 161.93, 146.44 (q,  $J = 38.0$  Hz), 144.29, 141.59, 138.76 (d,  $J = 10.9$  Hz), 130.68 (d,  $J = 10.0$  Hz), 120.17 (q,  $J = 269.8$  Hz), 112.01 (d,  $J = 21.9$  Hz), 108.83 (d,  $J = 2.7$  Hz), 108.46, 102.43 (d,  $J = 27.7$  Hz), 62.27, 32.15, 13.77;  $^{19}\text{F}$  NMR: (376 MHz,  $\text{CDCl}_3$ )  $\delta$  - 61.74 (s, 3F,  $\text{CF}_3$ ),  $\delta$  - 102.47 (s, 1F); **HRMS-ESI (m/z)**: calcd for  $\text{C}_{15}\text{H}_{11}\text{F}_4\text{N}_3\text{O}_3$   $[\text{M}+\text{H}]^+$  358.0815, found 358.0807.



Scheme 2, 4j

**Ethyl 8-chloro-6-methyl-5-oxo-2-(trifluoromethyl)-5,6-dihydropyrazolo[1,5-c]quinazoline-1-carboxylate (4j)**: White solid, 67.5 mg, 72% yield, m.p. 203.7 – 204.2 °C;  $^1\text{H}$  NMR: (400 MHz,  $\text{CDCl}_3$ )  $\delta$  9.10 (d,  $J = 8.8$  Hz, 1H), 7.40 – 7.34 (m, 2H), 4.45 (q,  $J = 7.2$  Hz, 2H), 3.83 (s, 3H), 1.43 (t,  $J = 7.2$  Hz, 3H);  $^{13}\text{C}$  NMR: (100 MHz,  $\text{CDCl}_3$ )  $\delta$  161.94, 146.56 (q,  $J = 38.0$  Hz), 144.28, 141.46, 139.05, 137.70, 129.34, 124.66, 120.19 (q,  $J = 269.9$  Hz), 115.11, 110.88, 109.08, 62.38, 32.14, 13.82;  $^{19}\text{F}$  NMR: (376 MHz,  $\text{CDCl}_3$ )  $\delta$  - 61.72 (s, 3F,  $\text{CF}_3$ ); **HRMS-ESI (m/z)**: calcd for  $\text{C}_{15}\text{H}_{11}\text{ClF}_3\text{N}_3\text{O}_3$   $[\text{M}+\text{H}]^+$  374.0519, found 374.0514.



Scheme 2, 4k

**Ethyl 8-bromo-6-methyl-5-oxo-2-(trifluoromethyl)-5,6-dihydropyrazolo[1,5-c]quinazoline-1-carboxylate (4k):** White solid, 67.9 mg, 65% yield, m.p. 189.7 – 190.3 °C;  $^1\text{H NMR}$ : (400 MHz,  $\text{CDCl}_3$ )  $\delta$  9.01 (d,  $J = 8.8$  Hz, 1H), 7.55 – 7.49 (m, 2H), 4.45 (q,  $J = 7.2$  Hz, 2H), 3.83 (s, 3H), 1.42 (t,  $J = 7.2$  Hz, 3H);  $^{13}\text{C NMR}$ : (100 MHz,  $\text{CDCl}_3$ )  $\delta$  161.92, 146.56 (d,  $J = 38.3$  Hz), 144.22, 141.50, 137.61, 129.27, 127.54, 127.33, 120.18 (q,  $J = 269.9$  Hz), 118.05, 111.23, 109.17, 62.39, 32.14, 13.81;  $^{19}\text{F NMR}$ : (376 MHz,  $\text{CDCl}_3$ )  $\delta$  - 61.72 (s, 3F,  $\text{CF}_3$ ); **HRMS-ESI (m/z):** calcd for  $\text{C}_{15}\text{H}_{11}\text{BrF}_3\text{N}_3\text{O}_3$   $[\text{M}+\text{H}]^+$  418.0014, found 418.0008.



Scheme 2, 4l

**Ethyl 8-methoxy-6-methyl-5-oxo-2-(trifluoromethyl)-5,6-dihydropyrazolo[1,5-c]quinazoline-1-carboxylate (4l):** White solid, 59.8 mg, 65% yield, m.p. 202.1 – 203 °C;  $^1\text{H NMR}$ : (400 MHz,  $\text{CDCl}_3$ )  $\delta$  9.10 (d,  $J = 9.2$  Hz, 1H), 6.94 (dd,  $J = 9.2, 2.4$  Hz, 1H), 6.80 (d,  $J = 2.4$  Hz, 1H), 4.44 (q,  $J = 7.2$  Hz, 2H), 3.95 (s, 3H), 3.80 (s, 3H), 1.43 (t,  $J = 7.2$  Hz, 3H);  $^{13}\text{C NMR}$ : (100 MHz,  $\text{CDCl}_3$ )  $\delta$  163.00, 162.23, 146.39 (d,  $J = 37.2$  Hz), 144.74, 142.40, 138.67, 129.91, 120.40 (q,  $J = 269.5$  Hz), 110.11, 107.30, 105.75, 100.37, 62.03, 55.91, 31.92, 13.86;  $^{19}\text{F NMR}$ : (376 MHz,  $\text{CDCl}_3$ )  $\delta$  - 61.75 (s, 3F,  $\text{CF}_3$ ); **HRMS-ESI (m/z):** calcd for  $\text{C}_{16}\text{H}_{14}\text{F}_3\text{N}_3\text{O}_4$   $[\text{M}+\text{H}]^+$  370.1015, found 370.1010.



Scheme 2, 4m

**Ethyl 7-fluoro-6-methyl-5-oxo-2-(trifluoromethyl)-5,6-dihydropyrazolo[1,5-c]quinazoline-1-carboxylate (4m):** Purple solid, 54.6 mg, 61% yield, m.p. 180.2 – 181.1 °C;  $^1\text{H NMR}$ : (400 MHz,  $\text{CDCl}_3$ )  $\delta$  8.80 – 8.78 (m, 1H), 7.44 – 7.38 (m, 1H), 7.36 – 7.31 (m, 1H), 4.46 (q,  $J = 7.2$  Hz, 2H), 4.02 (d,  $J = 9.2$  Hz, 3H), 1.43 (t,  $J = 7.2$  Hz, 3H);  $^{13}\text{C NMR}$ : (100 MHz,  $\text{CDCl}_3$ )  $\delta$  162.01, 150.63 (d,  $J = 246.9$

Hz), 146.55 (q,  $J = 38.3$  Hz), 144.81, 140.97, 125.84 (d,  $J = 7.2$  Hz), 125.21 (d,  $J = 8.6$  Hz), 123.46 (d,  $J = 3.9$  Hz), 120.48 (d,  $J = 23.1$  Hz), 120.18 (q,  $J = 270.1$  Hz), 114.84 (d,  $J = 1.9$  Hz), 109.48, 62.49, 36.44, 13.83;  $^{19}\text{F NMR}$ : (376 MHz,  $\text{CDCl}_3$ )  $\delta$  - 61.69 (s, 3F,  $\text{CF}_3$ ),  $\delta$  - 119.36 (s, 1F); **HRMS-ESI (m/z)**: calcd for  $\text{C}_{15}\text{H}_{11}\text{F}_4\text{N}_3\text{O}_3$   $[\text{M}+\text{H}]^+$  358.0815, found 358.0810.



Scheme 2, 4n

**Ethyl 6,7-dimethyl-5-oxo-2-(trifluoromethyl)-5,6-dihydropyrazolo[1,5-c]quinazoline-1-carboxylate (4n)**: White solid, 32.5 mg, 35% yield, m.p. 119.7 – 120.6 °C;  $^1\text{H NMR}$ : (400 MHz,  $\text{CDCl}_3$ )  $\delta$  8.74 (d,  $J = 8.0$  Hz, 1H), 7.45 (d,  $J = 7.6$  Hz, 1H), 7.30 – 7.26 (m, 1H), 4.45 (q,  $J = 7.6$  Hz, 2H), 3.85 (s, 1H), 2.67 (s, 3H), 1.42 (t,  $J = 7.2$  Hz, 2H);  $^{13}\text{C NMR}$ : (100 Hz,  $\text{CDCl}_3$ )  $\delta$  162.29, 146.43 (q,  $J = 37.3$  Hz), 146.24, 142.05, 137.75, 136.99, 126.55, 125.20, 124.84, 120.33 (q,  $J = 269.4$  Hz), 114.53, 108.92, 62.31, 39.73, 23.27, 13.85;  $^{19}\text{F NMR}$ : (376 MHz,  $\text{CDCl}_3$ )  $\delta$  - 61.72 (s, 3F,  $\text{CF}_3$ ); **HRMS-ESI (m/z)**: calcd for  $\text{C}_{16}\text{H}_{11}\text{F}_6\text{N}_3\text{O}_4$   $[\text{M}+\text{Na}]^+$  376.0885, found 376.0890.



Scheme 2, 4o

**Ethyl 6-methyl-5-oxo-7-(trifluoromethoxy)-2-(trifluoromethyl)-5,6-dihydropyrazolo[1,5-c]quinazoline-1-carboxylate (4o)**: White solid, 43.5 mg, 43% yield, m.p. 135.1 – 136.2 °C;  $^1\text{H NMR}$ : (400 MHz,  $\text{CDCl}_3$ )  $\delta$  9.01 (dd,  $J = 8.0, 1.2$  Hz, 1H), 7.61 – 7.58 (m, 1H), 7.57 – 7.40 (m, 1H), 4.47 (q,  $J = 7.2$  Hz, 2H), 3.95 (s, 3H), 1.43 (t,  $J = 7.2$  Hz, 3H);  $^{13}\text{C NMR}$ : (100 Hz,  $\text{CDCl}_3$ )  $\delta$  162.00, 146.75 (d,  $J = 38.2$  Hz), 145.16, 140.80, 136.83, 130.95, 127.06, 126.66, 125.17, 120.60 (q,  $J = 258.6$  Hz), 120.14 (q,  $J = 269.9$  Hz), 115.56, 109.73, 62.57, 38.05, 13.84;  $^{19}\text{F NMR}$ : (376 MHz,  $\text{CDCl}_3$ )  $\delta$  - 57.63 (s, 3F,  $\text{CF}_3$ ),  $\delta$  - 61.73 (s, 3F,  $\text{CF}_3$ ); **HRMS-ESI (m/z)**: calcd for  $\text{C}_{16}\text{H}_{11}\text{F}_6\text{N}_3\text{O}_4$   $[\text{M}+\text{H}]^+$  424.0732, found 424.0727.



Scheme 2, 4p

**Ethyl 6,7,9-trimethyl-5-oxo-2-(trifluoromethyl)-5,6-dihydropyrazolo[1,5-c]quinazoline-1-carboxylate (4p):** White solid, 51.8 mg, 57% yield, m.p. 57.1 – 57.7 °C;  $^1\text{H NMR}$ : (400 MHz,  $\text{CDCl}_3$ )  $\delta$  8.54 (s, 1H), 7.28 (s, 1H), 4.47 (q,  $J = 7.2$  Hz, 1H), 3.83 (s, 3H), 2.64 (s, 3H), 2.41 (s, 3H), 1.43 (t,  $J = 7.6$  Hz, 3H);  $^{13}\text{C NMR}$ : (100 MHz,  $\text{CDCl}_3$ )  $\delta$  162.28, 146.30 (q,  $J = 38.0$  Hz), 146.22, 141.98, 138.09, 135.54, 134.60, 126.27, 124.99, 120.32 (q,  $J = 269.8$  Hz), 114.31, 108.65, 62.26, 39.61, 23.17, 20.83, 13.85;  $^{19}\text{F NMR}$ : (376 MHz,  $\text{CDCl}_3$ )  $\delta$  - 61.69 (s, 3F,  $\text{CF}_3$ ); **HRMS-ESI (m/z):** calcd for  $\text{C}_{17}\text{H}_{16}\text{F}_3\text{N}_3\text{O}_3$   $[\text{M}+\text{H}]^+$  368.1222, found 368.1214.



Scheme 2, 4q

**Ethyl 5-oxo-2-(trifluoromethyl)-5,6-dihydropyrazolo[1,5-c]quinazoline-1-carboxylate (4q):** White solid, 28.6 mg, 37% yield, m.p. 121.5 – 122.4 °C;  $^1\text{H NMR}$ : (400 MHz,  $\text{DMSO-d}_6$ )  $\delta$  12.48 (s, 1H), 8.71 – 8.69 (m, 1H), 7.65 – 7.61 (m, 1H), 7.38 – 7.29 (m, 2H), 4.40 (q,  $J = 7.2$  Hz, 2H), 1.34 (t,  $J = 7.2$  Hz, 3H);  $^{13}\text{C NMR}$ : (100 MHz,  $\text{DMSO-d}_6$ )  $\delta$  161.77, 143.92 (d,  $J = 37.0$  Hz), 143.55, 143.34, 136.33, 132.80, 126.44, 123.60, 120.92 (q,  $J = 268.8$  Hz), 116.54, 111.43, 107.91, 62.16, 14.01;  $^{19}\text{F NMR}$ : (376 MHz,  $\text{DMSO-d}_6$ )  $\delta$  - 60.11 (s, 3F,  $\text{CF}_3$ ); **HRMS-ESI (m/z):** calcd for  $\text{C}_{14}\text{H}_{10}\text{F}_3\text{N}_3\text{O}_3$   $[\text{M}+\text{H}]^+$  326.0753, found 326.0746.



Scheme 2, 4r

**Ethyl 5-oxo-6-phenyl-2-(trifluoromethyl)-5,6-dihydropyrazolo[1,5-c]quinazoline-1-carboxylate (4r):** White solid, 67.7 mg, 68% yield, m.p. 216.7 – 217.2 °C;  $^1\text{H NMR}$ : (400 MHz,  $\text{CDCl}_3$ )  $\delta$  9.05 (dd,  $J = 8.0, 1.2$  Hz, 1H), 7.68 – 7.59 (m, 3H), 7.48 – 7.43 (m, 1H), 7.40 – 7.36 (m, 3H), 6.70 (dd,  $J = 8.4, 1.2$  Hz, 1H), 4.49 (q,  $J = 7.2$  Hz, 2H), 1.46 (t,  $J = 7.2$  Hz, 3H);  $^{13}\text{C NMR}$ : (100 MHz,  $\text{CDCl}_3$ )  $\delta$  162.18,

146.51 (d,  $J = 38.1$  Hz), 144.04, 142.34, 138.08, 135.86, 132.32, 130.78, 130.15, 128.87, 127.44, 124.47, 120.32 (q,  $J = 269.8$  Hz), 116.88, 112.18, 109.23, 62.35, 13.88;  $^{19}\text{F}$  NMR: (376 MHz,  $\text{CDCl}_3$ )  $\delta$  - 61.68 (s, 3F,  $\text{CF}_3$ ); **HRMS-ESI (m/z)**: calcd for  $\text{C}_{20}\text{H}_{14}\text{F}_3\text{N}_3\text{O}_3$   $[\text{M}+\text{H}]^+$  402.1066, found 402.1058.



Scheme 2, 4s

**Ethyl 6-benzyl-5-oxo-2-(trifluoromethyl)-5,6-dihydropyrazolo[1,5-c]quinazoline-1-carboxylate (4s)**: White solid, 79.7 mg, 77% yield, m.p. 151.6 – 152.4 °C;  $^1\text{H}$  NMR: (400 MHz,  $\text{CDCl}_3$ )  $\delta$  9.03 (d,  $J = 8.4$  Hz, 1H), 7.56 - 7.52 (m, 1H), 7.37 – 7.28 (m, 7H), 5.62 (s, 2H), 4.48 (q,  $J = 6.8$  Hz, 2H), 1.44 (t,  $J = 7.2$  Hz, 3H);  $^{13}\text{C}$  NMR: (100 MHz,  $\text{CDCl}_3$ )  $\delta$  162.15, 146.56 (d,  $J = 38.2$  Hz), 145.13, 142.02, 135.92, 134.65, 132.75, 129.22, 128.16, 127.85, 126.72, 124.42, 121.65, 114.23 (q,  $J = 325.4$  Hz), 62.34, 48.39, 13.87;  $^{19}\text{F}$  NMR: (376 MHz,  $\text{CDCl}_3$ )  $\delta$  - 61.70 (s, 3F,  $\text{CF}_3$ ); **HRMS-ESI (m/z)**: calcd for  $\text{C}_{21}\text{H}_{16}\text{F}_3\text{N}_3\text{O}_3$   $[\text{M}+\text{H}]^+$  416.1222, found 416.1217.



Scheme 2, 4t

**Ethyl 6-allyl-5-oxo-2-(trifluoromethyl)-5,6-dihydropyrazolo[1,5-c]quinazoline-1-carboxylate (4t)**: White solid, 63.5 mg, 65% yield, m.p. 191.3 – 192.6 °C;  $^1\text{H}$  NMR: (400 MHz,  $\text{CDCl}_3$ )  $\delta$  9.04 (d,  $J = 8.0$  Hz, 1H), 7.67 – 7.63 (m, 1H), 7.41 – 7.37 (m, 2H), 6.03 – 5.93 (m, 1H), 5.34 – 5.23 (m, 2H), 5.02 (d,  $J = 4.8$  Hz, 2H), 4.47 (q,  $J = 7.2$  Hz, 2H), 1.44 (t,  $J = 7.2$  Hz, 3H);  $^{13}\text{C}$  NMR: (100 MHz,  $\text{CDCl}_3$ )  $\delta$  162.18, 146.45 (d,  $J = 38.1$  Hz), 144.40, 141.95, 135.89, 132.71, 130.34, 127.86, 124.37, 120.32 (q,  $J = 269.9$  Hz), 118.79, 115.62, 112.52, 108.98, 62.33, 46.98, 13.88;  $^{19}\text{F}$  NMR: (376 MHz,  $\text{CDCl}_3$ )  $\delta$  - 61.69 (s, 3F,  $\text{CF}_3$ ); **HRMS-ESI (m/z)**: calcd for  $\text{C}_{17}\text{H}_{14}\text{F}_3\text{N}_3\text{O}_3$   $[\text{M}+\text{H}]^+$  366.1066, found 366.1060.



Scheme 2, 4u

**Propyl 6-methyl-5-oxo-2-(trifluoromethyl)-5,6-dihydropyrazolo[1,5-c]quinazoline-1-carboxylate**

**(4u):** White solid, 38.5 mg, 44% yield, m.p. 143.4 – 144.3 °C; <sup>1</sup>H NMR: (400 MHz, CDCl<sub>3</sub>) δ 9.03 (d, *J* = 8.4 Hz, 1H), 7.71 – 7.67 (m, 1H), 7.42 – 7.38 (m, 2H), 4.36 (t, *J* = 6.8 Hz, 2H), 3.85 (s, 3H), 1.83 (q, *J* = 7.2 Hz, 2H), 1.04 (t, *J* = 7.6 Hz, 3H); <sup>13</sup>C NMR: (100 MHz, CDCl<sub>3</sub>) δ 162.30, 146.17 (d, *J* = 38.0 Hz), 144.58, 141.87, 136.60, 132.81, 127.79, 124.37, 120.30 (q, *J* = 270.0 Hz), 114.89, 112.36, 108.91, 68.05, 31.97, 21.78, 10.51; <sup>19</sup>F NMR: (376 MHz, CDCl<sub>3</sub>) δ - 61.71 (s, 3F, CF<sub>3</sub>); **HRMS-ESI (m/z):** calcd for C<sub>16</sub>H<sub>14</sub>F<sub>3</sub>N<sub>3</sub>O<sub>3</sub> [M+H]<sup>+</sup> 354.1066, found 354.1060.



Scheme 2, 4v

**Isopropyl 6-methyl-5-oxo-2-(trifluoromethyl)-5,6-dihydropyrazolo[1,5-c]quinazoline-1-**

**carboxylate (4v):** White solid, 37.8 mg, 43% yield, m.p. 176.1 – 177.3 °C; <sup>1</sup>H NMR: (400 MHz, CDCl<sub>3</sub>) δ 9.05 (d, *J* = 8.0 Hz, 1H), 7.71 – 7.66 (m, 1H), 7.42 – 7.39 (m, 2H), 5.36 – 5.29 (m, 1H), 3.85 (s, 3H), 1.42 (d, *J* = 6.4 Hz, 6H); <sup>13</sup>C NMR: (100 MHz, CDCl<sub>3</sub>) δ 161.49, 146.00 (q, *J* = 37.8 Hz), 144.44, 141.58, 136.41, 132.64, 127.56, 124.19, 120.28 (q, *J* = 269.5 Hz), 114.77, 112.19, 109.26, 70.32, 31.83, 21.50; <sup>19</sup>F NMR: (376 MHz, CDCl<sub>3</sub>) δ - 61.34 (s, 3F, CF<sub>3</sub>); **HRMS-ESI (m/z):** calcd for C<sub>16</sub>H<sub>14</sub>F<sub>3</sub>N<sub>3</sub>O<sub>3</sub> [M+H]<sup>+</sup> 354.1066, found 354.1057.



Scheme 2, 4w

**Tert-butyl 6-methyl-5-oxo-2-(trifluoromethyl)-5,6-dihydropyrazolo[1,5-c]quinazoline-1-**

**carboxylate (4w):** White solid, 76.1 mg, 69% yield, m.p. 181.3 – 182.3 °C; <sup>1</sup>H NMR: (400 MHz, CDCl<sub>3</sub>) δ 8.94 (dd, *J* = 8.0, 1.6 Hz, 1H), 7.67 – 7.63 (m, 1H), 7.40 – 7.52 (m, 2H), 3.83 (s, 3H), 1.64 (s, 9H); <sup>13</sup>C NMR: (100 MHz, CDCl<sub>3</sub>) δ 161.33, 145.96 (q, *J* = 37.7 Hz), 144.61, 141.27, 136.44, 132.54, 127.49, 124.29, 120.37 (q, *J* = 269.8 Hz), 114.84, 112.44, 110.59, 83.91, 31.90, 27.97; <sup>19</sup>F NMR:

(376 MHz, CDCl<sub>3</sub>)  $\delta$  - 61.25 (s, 3F, CF<sub>3</sub>); **HRMS-ESI (m/z)**: calcd for C<sub>17</sub>H<sub>16</sub>F<sub>3</sub>N<sub>3</sub>O<sub>3</sub> [M+H]<sup>+</sup> 368.1222, found 368.1213.

## 6. Transformation of 4k into 5–10 (Scheme 4)

### 6.1 Synthesis of 5 from 4k.



To a 25 mL flame-dried vial with a magnetic stir bar, **4k** (83.6 mg, 0.2 mmol), phenylacetylene (40.8 mg, 0.4 mmol), Pd(PPh<sub>3</sub>)<sub>2</sub>Cl<sub>2</sub> (14.0 mg, 0.02 mmol), CuI (4.0 mg, 0.02 mmol), Et<sub>3</sub>N (5 mL), and DMF (1 mL) were added under argon atmosphere at 60 °C for 24 h. After the completion of the reaction, it was diluted with water, and extracted with dichloromethane (15 mL  $\times$  3). The combined organic phase was concentrated and purified by flash column chromatography to afford the desired product **5** (66.4 mg, 76% yield).<sup>3</sup> White solid, m.p. 170.7 – 171.5 °C; **<sup>1</sup>H NMR**: (400 MHz, CDCl<sub>3</sub>)  $\delta$  9.07 (d, *J* = 8.8 Hz, 1H), 7.60 – 7.53 (m, 2H), 7.50 (d, *J* = 6.8 Hz, 2H), 7.39 (dd, *J* = 5.3, 1.8 Hz, 3H), 4.46 (q, *J* = 7.2 Hz, 2H), 3.86 (s, 3H), 1.43 (t, *J* = 7.2 Hz, 3H); **<sup>13</sup>C NMR**: (100 MHz, CDCl<sub>3</sub>)  $\delta$  162.01, 146.46 (q, *J* = 38.3 Hz), 144.46, 141.56, 136.73, 131.95, 129.36, 128.68, 127.90, 127.23, 122.20, 120.29 (q, *J* = 269.5 Hz), 117.59, 111.84, 109.13, 93.59, 88.20, 62.33, 32.03, 13.83; **HRMS-ESI (m/z)**: calcd for C<sub>23</sub>H<sub>16</sub>F<sub>3</sub>N<sub>3</sub>O<sub>3</sub> [M+H]<sup>+</sup> 440.1222, found 440.1228.

### 6.2 Synthesis of 6 from 4k.



To a 5 mL flame-dried vial with a magnetic stir bar, **4k** (83.6 mg, 0.2 mmol), phenylboronic acid (36.6 mg, 0.3 mmol), Pd(OAc)<sub>2</sub> (2.2 mg, 0.01 mmol), Cs<sub>2</sub>CO<sub>3</sub> (65.2 mg, 0.4 mmol), butyl-1-adamantyl phosphine (4.4 mg, 0.24 mmol), and DCE (2.0 mL) were added under argon atmosphere at 80 °C for 12 h. After the completion of the reaction, it was concentrated and purified by flash column chromatography to afford the desired product **6** (72.2 mg, 88% yield).<sup>3</sup> m.p. 144.9 –

145.1°C; <sup>1</sup>H NMR: (400 MHz, CDCl<sub>3</sub>) δ 9.14 (d, *J* = 8.8 Hz, 1H), 7.66 – 7.61 (m, 3H), 7.54 – 7.44 (m, 4H), 4.48 (q, *J* = 7.2 Hz, 2H), 3.90 (s, 3H), 1.44 (t, *J* = 7.2 Hz, 3H); <sup>13</sup>C NMR: δ 162.14, 146.42 (d, *J* = 38.0 Hz), 145.84, 144.70, 141.93, 139.40, 137.19, 129.34, 129.00, 128.40, 127.47, 123.30, 120.34 (q, *J* = 269.7 Hz), 113.22, 111.25, 108.78, 62.25, 32.02, 13.86; HRMS-ESI (*m/z*): calcd for C<sub>21</sub>H<sub>16</sub>F<sub>3</sub>N<sub>3</sub>O<sub>3</sub> [M+Na]<sup>+</sup> 438.1041, found 438.1041.

### 6.3 Synthesis of **7** from **4k**.



To a 5 mL flame-dried vial with a magnetic stir bar, **4k** (83.6 mg, 0.2 mmol), styrene (41.7 mg, 0.4 mmol), Pd(PPh<sub>3</sub>)<sub>4</sub> (25 mg, 0.02 mmol), PPh<sub>3</sub> (0.6 mg, 0.002 mmol) and Et<sub>3</sub>N (101.1 mg, 1 mmol) in DMF (2 mL) was stirred at 140°C under Ar for 8 hours. After cooling to room temperature, the mixture was diluted with H<sub>2</sub>O and extracted with EtOAc. The combined organic layer was washed with brine and dried over Na<sub>2</sub>SO<sub>4</sub>. Then the filtrate was concentrated and purified by column chromatography to give the desired product **7** (69.8 mg, 81% yield).<sup>4</sup> m.p. 182.1 – 182.9 °C; <sup>1</sup>H NMR: (400 MHz, CDCl<sub>3</sub>) δ 9.05 (d, *J* = 8.4 Hz, 1H), 7.56 (d, *J* = 8.0 Hz, 3H), 7.42 – 7.30 (m, 4H), 7.26 – 7.14 (m, 2H), 4.47 (q, *J* = 7.2 Hz, 2H), 3.89 (s, 3H), 1.44 (t, *J* = 7.2 Hz, 3H); <sup>13</sup>C NMR: (100 MHz, CDCl<sub>3</sub>) δ 162.16, 146.43 (d, *J* = 37.7 Hz), 144.71, 141.94, 137.26, 136.28, 132.76, 129.04, 128.93, 128.23, 127.09, 126.94, 122.04, 120.36 (q, *J* = 269.7 Hz), 112.64, 111.29, 108.61, 62.23, 31.98, 13.87; HRMS-ESI (*m/z*): calcd for C<sub>23</sub>H<sub>18</sub>F<sub>3</sub>N<sub>3</sub>O<sub>3</sub> [M+H]<sup>+</sup> 442.1379, found 442.1378.

### 6.4 Synthesis of **8** from **4k**.



To a 5 mL flame-dried vial with a magnetic stir bar, **4k** (83.6 mg, 0.2 mmol), (BPin)<sub>2</sub> (76.2 mg, 0.3 mmol), KOAc (40.0 mg, 0.4 mmol), PCy<sub>3</sub> (11.3 mg, 20 mol%), Pd(OAc)<sub>2</sub> (4.5 mg, 10 mol%), and PhMe (2.0 mL) were added under argon atmosphere, and the mixture was stirred at 70 °C for 2 h. After the completion of the reaction, it was purified by flash column chromatography on silica S32 gel (petroleum ether/ethyl acetate = 10:1) to afford the desired product **8** (76.7 mg, 85% yield).<sup>3</sup>

White solid, m.p. 137.6 – 138.5 °C;  $^1\text{H NMR}$ : (400 MHz,  $\text{CDCl}_3$ )  $\delta$  8.97 (d,  $J$  = 8.0 Hz, 1H), 7.81 – 7.79 (m, 2H), 4.47 (q,  $J$  = 7.2 Hz, 2H), 3.91 (s, 3H), 1.43 (t,  $J$  = 7.2 Hz, 3H), 1.38 (s, 12H);  $^{13}\text{C NMR}$ : (100 MHz,  $\text{CDCl}_3$ )  $\delta$  162.09, 146.29 (d,  $J$  = 38.3 Hz), 144.67, 141.64, 135.87, 130.25, 126.69, 120.95, 120.33 (q,  $J$  = 269.9 Hz), 114.31, 109.41, 84.81, 62.32, 32.15, 25.02, 13.87; **HRMS-ESI (m/z)**: calcd for  $\text{C}_{21}\text{H}_{23}\text{F}_3\text{N}_3\text{O}_5\text{B}$  [ $\text{M}+\text{Na}$ ] $^+$  488.1581, found 488.1583.

#### 6.5 Synthesis of **9** from **4k**.



To a 5 mL flame-dried vial with a magnetic stir bar, **4k** (83.6 mg, 0.2 mmol),  $\text{NH}_2\text{Boc}$  (35.2 mg, 0.3 mmol),  $\text{Pd}_2(\text{dba})_3$  (9.2 mg, 5 mol%),  $\text{XPhos}$  (19.1 mg, 20 mol%),  $\text{Cs}_2\text{CO}_3$  (97.7 mg, 3 mmol), and  $\text{PhMe}$  (2.0 mL) were added under argon atmosphere, and the mixture was stirred at 110 °C for 12 h. After the completion of the reaction, it was purified by flash column chromatography on silica gel (petroleum ether/ethyl acetate = 15:1 - 4:1) to afford the desired product **9** (73.5 mg, 80% yield). Yellow solid, m.p. 110.3 – 110.9 °C;  $^1\text{H NMR}$ : (400 MHz,  $\text{DMSO}-d_6$ )  $\delta$  9.97 (s, 1H), 8.73 – 8.70 (m, 1H), 7.81 (s, 1H), 7.39 – 7.37 (m, 1H), 4.38 (q,  $J$  = 6.4 Hz, 2H), 3.63 (s, 3H), 1.52 (s, 9H), 1.33 (t,  $J$  = 7.2 Hz, 3H);  $^{13}\text{C NMR}$ : (100 MHz,  $\text{CDCl}_3$ )  $\delta$  162.25, 152.23, 146.42 (d,  $J$  = 38.5 Hz), 144.85, 142.79, 142.26, 138.26, 128.87, 120.43 (d,  $J$  = 260.0 Hz), 113.91, 107.58, 107.04, 103.20, 81.98, 62.04, 32.10, 28.35, 13.83; **HRMS-ESI (m/z)**: calcd for  $\text{C}_{20}\text{H}_{21}\text{F}_3\text{N}_4\text{O}_5$  [ $\text{M}+\text{Na}$ ] $^+$  477.1362, found 477.1366.

#### 6.6 Synthesis of **10** from **4k**.



To a 5 mL flame-dried vial with a magnetic stir bar, **4k** (83.6 mg, 0.2 mmol),  $\text{Pd}(\text{PPh}_3)_4$  (11.6 mg, 5 mol%), allyltributylstannane (124.0  $\mu\text{L}$ , 0.4 mmol), and  $\text{DMF}$  (2.0 mL) were added under argon atmosphere, and the mixture was stirred at 90 °C for 1 h. After the completion of the reaction, it was purified by flash column chromatography on silica gel (petroleum ether/ethyl acetate = 5:1) to afford the desired product **10** (69.8 mg, 92% yield).<sup>3</sup> White solid, m.p. 83.2 – 84.5 °C;  $^1\text{H NMR}$ : (400 MHz,  $\text{CDCl}_3$ )  $\delta$  8.92 (d,  $J$  = 8.0 Hz, 1H), 7.21 – 7.16 (m, 2H), 6.01 – 5.91 (m, 1H), 5.17 – 5.12 (m,

2H), 4.43 (q,  $J = 7.2$  Hz, 2H), 3.80 (s, 2H), 3.52 (d,  $J = 6.8$  Hz, 2H), 1.41 (t,  $J = 7.2$  Hz, 3H);  $^{13}\text{C}$  NMR: (100 MHz,  $\text{CDCl}_3$ )  $\delta$  162.05, 146.16 (q,  $J = 37.9$  Hz), 144.58, 141.93, 136.81, 135.63, 127.78, 124.90, 120.32 (q,  $J = 269.5$  Hz), 117.60, 114.66, 110.36, 108.34, 62.12, 40.48, 31.84, 13.80; HRMS-ESI ( $m/z$ ): calcd for  $\text{C}_{18}\text{H}_{16}\text{F}_3\text{N}_3\text{O}_3$   $[\text{M}+\text{Na}]^+$  402.1041, found 402.1045.

## 7. Reference

1. J. Azizian, M. R. Mohammadizadeh, Z. Kazemizadeh, N. Karimi, A. A. Mohammadi, A. R.

- Karimi, A. Alizadeh, *Lett. Org. Chem.* 2006, **3**, 56–57.
2. T.-R. Li, S.-W. Duan, W Ding, Y.-Y. Liu, J.-R. Chen, L.-Q. Lu, W.-J. Xiao, *J. Org. Chem.* 2014, **79**, 2296–2302.
  3. Y.-C. Fang, J.-H. Chen, R.-F. Xiu, L.-R. Zhang, F.-H. Zheng, Y.-Z. Chen, Z.-W. Gao, W.-Y. Han, *Org. Chem. Front.* 2023, **10**, 3752–3759.
  4. D. Arora, H. Kumar, D. Malhotra, M Malhotra, *Pharmacologyonline* 2011, **3**, 659–668.

## 8. X-ray crystallographic data of 4a



X-ray of 4a  
(CCDC: 2349912)



4a

|                                             |                                                                              |
|---------------------------------------------|------------------------------------------------------------------------------|
| Empirical formula                           | C <sub>15</sub> H <sub>12</sub> F <sub>3</sub> N <sub>3</sub> O <sub>3</sub> |
| Formula weight                              | 339.28                                                                       |
| Temperature/K                               | 99.97(15)                                                                    |
| Crystal system                              | monoclinic                                                                   |
| Space group                                 | P2 <sub>1</sub> /n                                                           |
| a/Å                                         | 25.8074(13)                                                                  |
| b/Å                                         | 4.65278(14)                                                                  |
| c/Å                                         | 26.1585(13)                                                                  |
| α/°                                         | 90                                                                           |
| β/°                                         | 116.535(6)                                                                   |
| γ/°                                         | 90                                                                           |
| Volume/Å <sup>3</sup>                       | 2810.1(3)                                                                    |
| Z                                           | 8                                                                            |
| ρ <sub>calc</sub> /g/cm <sup>3</sup>        | 1.604                                                                        |
| μ/mm <sup>-1</sup>                          | 1.219                                                                        |
| F(000)                                      | 1392.0                                                                       |
| Crystal size/mm <sup>3</sup>                | 0.16 × 0.13 × 0.11                                                           |
| Radiation                                   | Cu Kα (λ = 1.54184)                                                          |
| 2 θ range for data collection/°             | 6.468 to 148.592                                                             |
| Index ranges                                | -31 ≤ h ≤ 28, -5 ≤ k ≤ 5, -4 ≤ l ≤ 32                                        |
| Reflections collected                       | 5524                                                                         |
| Independent reflections                     | 5524 [R <sub>int</sub> = 0.0388, R <sub>sigma</sub> = 0.0435]                |
| Data/restraints/parameters                  | 5524/0/438                                                                   |
| Goodness-of-fit on F <sup>2</sup>           | 1.108                                                                        |
| Final R indexes [I ≥ 2σ (I)]                | R <sub>1</sub> = 0.1144, wR <sub>2</sub> = 0.3068                            |
| Final R indexes [all data]                  | R <sub>1</sub> = 0.1181, wR <sub>2</sub> = 0.3085                            |
| Largest diff. peak/hole / e Å <sup>-3</sup> | 1.21/-0.68                                                                   |

**8.  $^1\text{H}$ ,  $^{13}\text{C}$  and  $^{19}\text{F}$  NMR spectra of 4a–w and 5–10**





<sup>19</sup>F-NMR (376 MHz)  
Solvent: CDCl<sub>3</sub>



Scheme 2, 4a





<sup>1</sup>H-NMR (400 MHz)  
Solvent: CDCl<sub>3</sub>



Scheme 2, 4b







$^{19}\text{F}$ -NMR (376 MHz)  
Solvent:  $\text{CDCl}_3$



Scheme 2, 4b





<sup>1</sup>H-NMR (400 MHz)  
Solvent: CDCl<sub>3</sub>



Scheme 2, 4c





$^{19}\text{F}$ -NMR (376 MHz)  
Solvent:  $\text{CDCl}_3$



Scheme 2, 4c









<sup>19</sup>F-NMR (376 MHz)  
Solvent: CDCl<sub>3</sub>



Scheme 2, 4d





<sup>13</sup>C-NMR (100 MHz)  
Solvent: CDCl<sub>3</sub>



<sup>19</sup>F-NMR (376 MHz)  
Solvent: CDCl<sub>3</sub>



Scheme 2, 4e







<sup>19</sup>F-NMR (376 MHz)  
Solvent: CDCl<sub>3</sub>



Scheme 2, 4f









<sup>19</sup>F-NMR (376 MHz)  
Solvent: CDCl<sub>3</sub>



Scheme 2, 4g







<sup>19</sup>F-NMR (376 MHz)  
Solvent: CDCl<sub>3</sub>



Scheme 2, 4h









<sup>19</sup>F-NMR (376 MHz)  
Solvent: CDCl<sub>3</sub>



Scheme 2, 4i





<sup>13</sup>C-NMR (100 MHz)  
Solvent: CDCl<sub>3</sub>



Scheme 2, 4j



<sup>19</sup>F-NMR (376 MHz)  
Solvent: CDCl<sub>3</sub>



Scheme 2, 4j











<sup>19</sup>F-NMR (376 MHz)  
Solvent: CDCl<sub>3</sub>



Scheme 2, 4k











<sup>19</sup>F-NMR (376 MHz)  
Solvent: CDCl<sub>3</sub>



Scheme 2, 4l



8.802  
 8.799  
 8.796  
 8.782  
 8.779  
 8.775  
 7.439  
 7.435  
 7.418  
 7.414  
 7.404  
 7.400  
 7.383  
 7.379  
 7.360  
 7.348  
 7.340  
 7.328  
 7.319  
 7.307  
 7.260 CDCl<sub>3</sub>

4.486  
 4.468  
 4.450  
 4.432  
 4.031  
 4.008

1.445  
 1.427  
 1.409

<sup>1</sup>H-NMR (400 MHz)  
 Solvent: CDCl<sub>3</sub>



Scheme 2, 4m





<sup>19</sup>F-NMR (376 MHz)  
Solvent: CDCl<sub>3</sub>











<sup>19</sup>F-NMR (376 MHz)  
Solvent: CDCl<sub>3</sub>



Scheme 2, 4n









<sup>19</sup>F-NMR (376 MHz)  
Solvent: CDCl<sub>3</sub>



Scheme 2, 4o











<sup>19</sup>F-NMR (376 MHz)  
Solvent: CDCl<sub>3</sub>



Scheme 2, 4p



<sup>1</sup>H-NMR (400 MHz)  
Solvent: DMSO-d<sub>6</sub>



Scheme 2, 4q





<sup>13</sup>C-NMR (100 MHz)  
Solvent: DMSO-d<sub>6</sub>



Scheme 2, 4q





<sup>19</sup>F-NMR (376 MHz)  
Solvent: DMSO-d<sub>6</sub>



Scheme 2, 4q











<sup>19</sup>F-NMR (376 MHz)  
Solvent: CDCl<sub>3</sub>



Scheme 2, 4r











<sup>19</sup>F-NMR (376 MHz)  
Solvent: CDCl<sub>3</sub>



Scheme 2, 4s







<sup>13</sup>C-NMR (100 MHz)  
Solvent: CDCl<sub>3</sub>



Scheme 2, 4t





<sup>19</sup>F-NMR (376 MHz)  
Solvent: CDCl<sub>3</sub>



Scheme 2, 4t













<sup>19</sup>F-NMR (376 MHz)  
Solvent: CDCl<sub>3</sub>



Scheme 2, 4u







<sup>13</sup>C-NMR (100 MHz)  
Solvent: CDCl<sub>3</sub>



Scheme 2, 4v





<sup>19</sup>F-NMR (376 MHz)  
Solvent: CDCl<sub>3</sub>



Scheme 2, 4v











<sup>19</sup>F-NMR (376 MHz)  
Solvent: CDCl<sub>3</sub>



Scheme 2, 4w













<sup>13</sup>C-NMR (100 MHz)  
Solvent: CDCl<sub>3</sub>



Scheme 4, 6













<sup>1</sup>H-NMR (400 MHz)  
Solvent: DMSO-d<sub>6</sub>



Scheme 4, 9









<sup>1</sup>H-NMR (400 MHz)  
Solvent: CDCl<sub>3</sub>



Scheme 4, 10
